# Supplementary material for: Thawing Permafrost as a Nitrogen Fertiliser: Implications for Climate Feedbacks
Source: MDPI journal article supplement (doi:10.3390/nitrogen3020023), 2022-06-03
Supplement: s1 [file s1]

Archive with 1 entries (1 files):
- nitrogen-1669778-supplementary.pdf
